# Supplementary material for: Magnetron Sputter-Deposited β-Ga2O3 Films on c-Sapphire Substrate: Effect of Rapid Thermal Annealing Temperature on Crystalline Quality
Source: MDPI journal article supplement (doi:10.3390/coatings12020140), 2022-01-25
Supplement: s1 [file s1]

Supplementary Material

# Magnetron Sputter-Deposited $\beta$ -Ga<sub>2</sub>O<sub>3</sub> Films on c-Sapphire Substrate: Effect of Rapid Thermal Annealing Temperature on Crystalline Quality

Sakal Pech <sup>†</sup>, Sara Kim <sup>†</sup> and Nam-Hoon Kim <sup>\*</sup>

Department of Electrical Engineering, Chosun University, Gwangju 61452, Korea; pechsakal@chosun.kr (S.P.); sarakim@chosun.kr (S.K.)

<sup>\*</sup> Correspondence: nhkim@chosun.ac.kr; Tel./Fax: +82-62-230-7028

<sup>†</sup> These authors contributed equally to this work

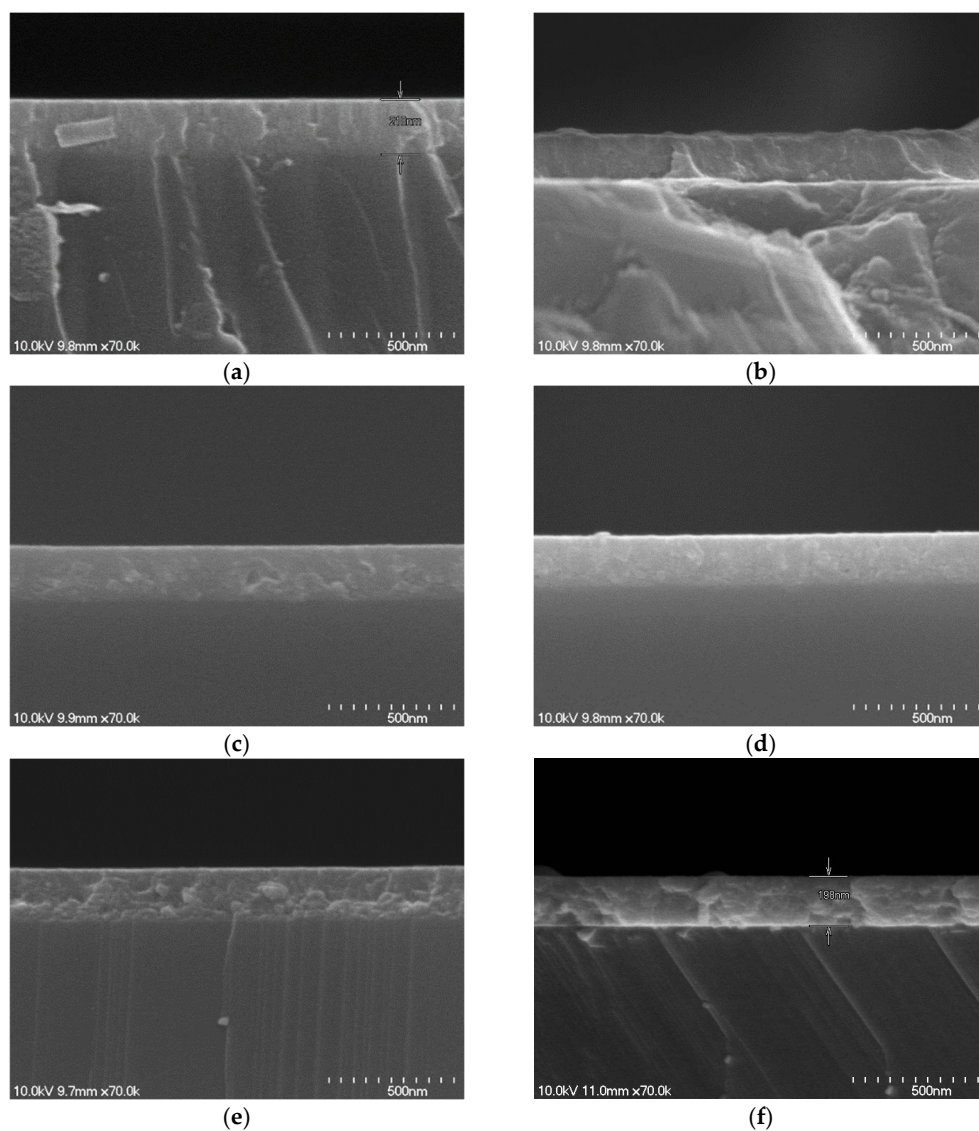

**Figure S1.** Cross-sectional field emission scanning electron microscope (FESEM) images of (a) as-deposited and annealed Ga<sub>2</sub>O<sub>3</sub> films at different post-annealing temperatures: (b) 500, (c) 600, (d) 700, (e) 800, and (f) 900 °C.
